# Supplementary material for: In silico screening of 4764 computation-ready, experimental metal–organic frameworks for CO2 separation
Source: Royal Society of Chemistry journal article supplement (doi:10.1039/c5ta08984k), 2015-12-17
Supplement: c5ta08984k1.pdf [file c5ta08984k1.pdf]

## Electronic supplementary information

### *In silico* screening of 4764 computation-ready, experimental metal–organic frameworks for CO<sub>2</sub> separation

Zhiwei Qiao, Kang Zhang and Jianwen Jiang\*

*Department of Chemical and Biomolecular Engineering, National University of Singapore, 117576, Singapore*

**Table S1.** Lennard-Jones parameters of CoRE-MOFs.

| Atom | $\epsilon/k_B$ [K] | $\sigma$ [Å] | Atom | $\epsilon/k_B$ [K] | $\sigma$ [Å] | Atom | $\epsilon/k_B$ [K] | $\sigma$ [Å] |
|------|--------------------|--------------|------|--------------------|--------------|------|--------------------|--------------|
| Ac   | 16.60              | 3.10         | Ge   | 190.69             | 3.81         | Po   | 163.52             | 4.20         |
| Ag   | 18.11              | 2.80         | Gd   | 4.53               | 3.00         | Pr   | 5.03               | 3.21         |
| Al   | 254.09             | 4.01         | H    | 22.14              | 2.57         | Pt   | 40.25              | 2.45         |
| Am   | 7.04               | 3.01         | Hf   | 36.23              | 2.80         | Pu   | 8.05               | 3.05         |
| Ar   | 93.08              | 3.45         | Hg   | 193.71             | 2.41         | Ra   | 203.27             | 3.28         |
| As   | 155.47             | 3.77         | Ho   | 3.52               | 3.04         | Rb   | 20.13              | 3.67         |
| At   | 142.89             | 4.23         | I    | 170.57             | 4.01         | Re   | 33.21              | 2.63         |
| Au   | 19.62              | 2.93         | In   | 301.39             | 3.98         | Rh   | 26.67              | 2.61         |
| B    | 90.57              | 3.64         | Ir   | 36.73              | 2.53         | Rn   | 124.78             | 4.25         |
| Ba   | 183.15             | 3.30         | K    | 17.61              | 3.40         | Ru   | 28.18              | 2.64         |
| Be   | 42.77              | 2.45         | Kr   | 110.69             | 3.69         | S    | 137.86             | 3.59         |
| Bi   | 260.63             | 3.89         | La   | 8.55               | 3.14         | Sb   | 225.91             | 3.94         |
| Bk   | 6.54               | 2.97         | Li   | 12.58              | 2.18         | Sc   | 9.56               | 2.94         |
| Br   | 126.29             | 3.73         | Lu   | 20.63              | 3.24         | Se   | 146.42             | 3.75         |
| C    | 52.83              | 3.43         | Lr   | 5.53               | 2.88         | Si   | 202.27             | 3.83         |
| Ca   | 119.75             | 3.03         | Md   | 5.53               | 2.92         | Sm   | 4.03               | 3.14         |
| Ca   | 119.75             | 3.03         | Mg   | 55.85              | 2.69         | Sn   | 285.28             | 3.91         |
| Cd   | 114.72             | 2.54         | Mn   | 6.54               | 2.64         | Sr   | 118.24             | 3.24         |
| Ce   | 6.54               | 3.17         | Mo   | 28.18              | 2.72         | Ta   | 40.75              | 2.82         |
| Cf   | 6.54               | 2.95         | N    | 34.72              | 3.26         | Tb   | 3.52               | 3.07         |
| Cl   | 114.21             | 3.52         | Na   | 15.09              | 2.66         | Tc   | 24.15              | 2.67         |
| Cm   | 6.54               | 2.96         | Ne   | 21.13              | 2.66         | Te   | 200.25             | 3.98         |
| Co   | 7.04               | 2.56         | Nb   | 29.69              | 2.82         | Th   | 13.08              | 3.03         |
| Cr   | 7.55               | 2.69         | Nd   | 5.03               | 3.18         | Ti   | 8.55               | 2.83         |
| Cu   | 2.52               | 3.11         | No   | 5.53               | 2.89         | Tl   | 342.14             | 3.87         |
| Cs   | 22.64              | 4.02         | Ni   | 7.55               | 2.52         | Tm   | 3.02               | 3.01         |
| Dy   | 3.52               | 3.05         | Np   | 9.56               | 3.05         | U    | 11.07              | 3.02         |
| Eu   | 4.03               | 3.11         | O    | 30.19              | 3.12         | V    | 8.05               | 2.80         |
| Er   | 3.52               | 3.02         | Os   | 18.62              | 2.78         | W    | 33.71              | 2.73         |
| Es   | 6.04               | 2.94         | P    | 153.46             | 3.69         | Xe   | 167.04             | 3.92         |
| F    | 25.16              | 3.00         | Pa   | 11.07              | 3.05         | Y    | 36.23              | 2.98         |
| Fe   | 6.54               | 2.59         | Pb   | 333.59             | 3.83         | Yb   | 114.72             | 2.99         |
| Fm   | 6.04               | 2.93         | Pd   | 24.15              | 2.58         | Zn   | 62.39              | 2.46         |
| Fr   | 25.16              | 4.37         | Pm   | 4.53               | 3.16         | Zr   | 34.72              | 2.78         |
| Ga   | 208.81             | 3.90         |      |                    |              |      |                    |              |

**Table S2.** Lennard-Jones parameters and charges of CO<sub>2</sub>, N<sub>2</sub> and CH<sub>4</sub>.

| Atom              | $\epsilon/k_B$ [K] | $\sigma$ [Å] | Charge | Atom               | $\epsilon/k_B$ [K] | $\sigma$ [Å] | Charge |
|-------------------|--------------------|--------------|--------|--------------------|--------------------|--------------|--------|
| C_CO <sub>2</sub> | 27.0               | 2.80         | +0.70  | N_N <sub>2</sub>   | 36.0               | 3.31         | -0.482 |
| O_CO <sub>2</sub> | 79.0               | 3.05         | -0.35  | com_N <sub>2</sub> | 0.00               | 0.00         | +0.964 |
| CH <sub>4</sub>   | 148.0              | 3.73         | 0.00   |                    |                    |              |        |

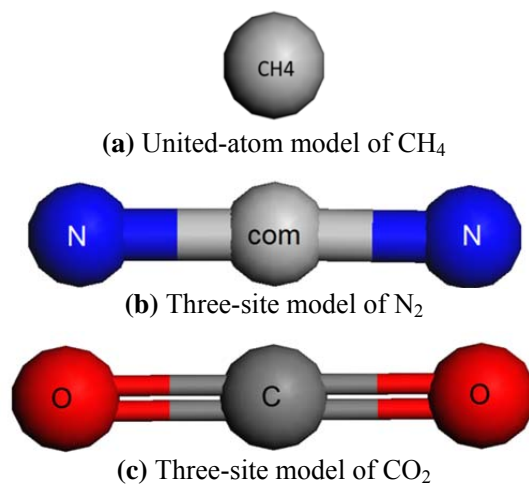

**Figure S1.** Models of CH<sub>4</sub>, N<sub>2</sub> and CO<sub>2</sub>.

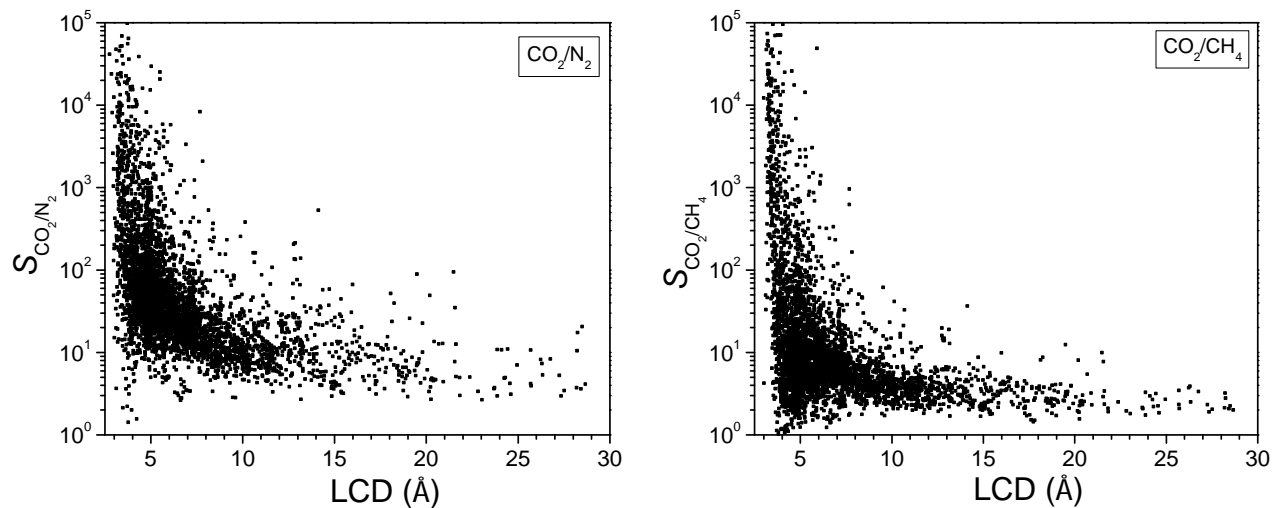

**Figure S2.** Relationships between selectivity  $S$  and LCD.

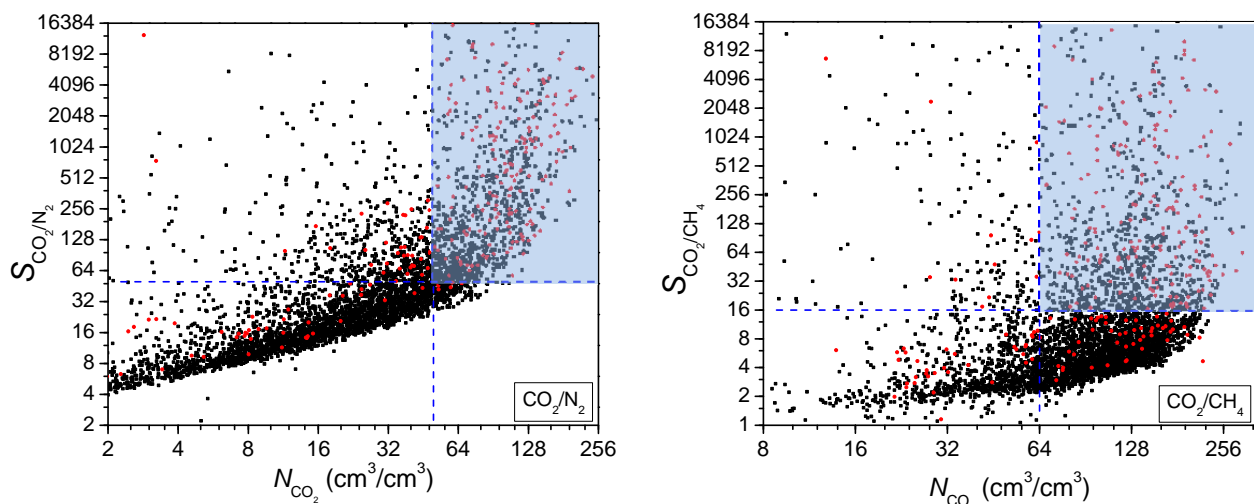

**Figure S3.** Relationships between selectivity  $S$  and  $\text{CO}_2$  adsorption capacity  $N_{\text{CO}_2}$ . The red points indicate alkali- and alkaline-MOFs.

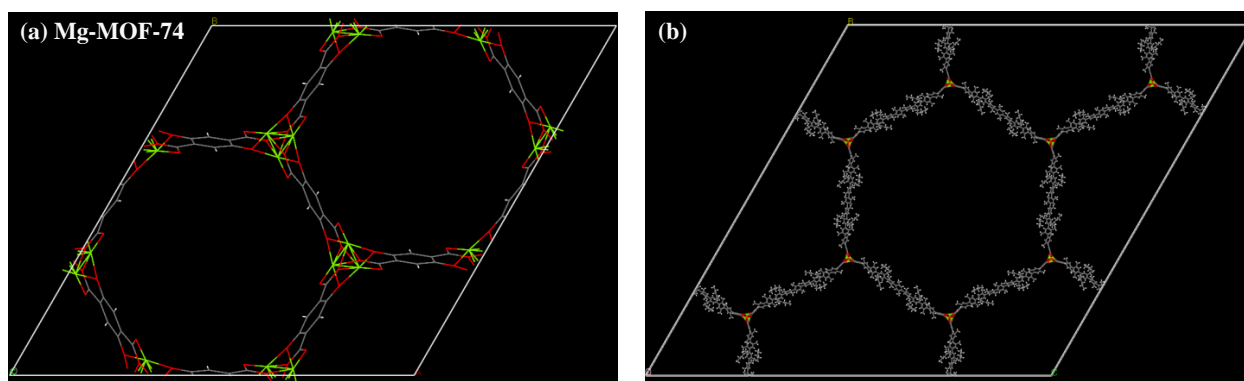

**Figure S4.** Mg-MOFs with different organic linkers.

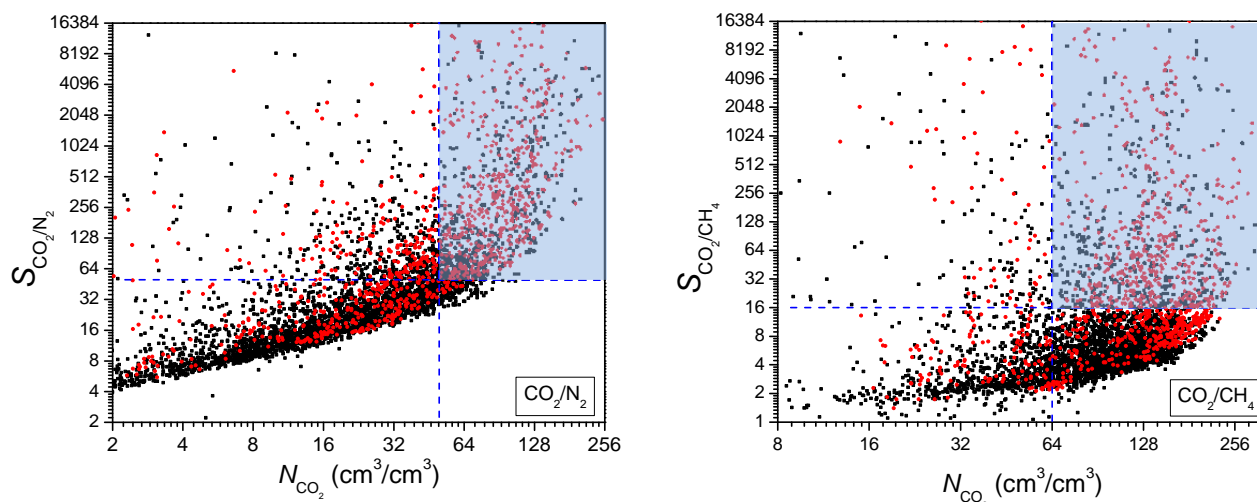

**Figure S5.** Relationships between selectivity  $S$  and  $\text{CO}_2$  adsorption capacity  $N_{\text{CO}_2}$ . The red points indicate lanthanide-MOFs.

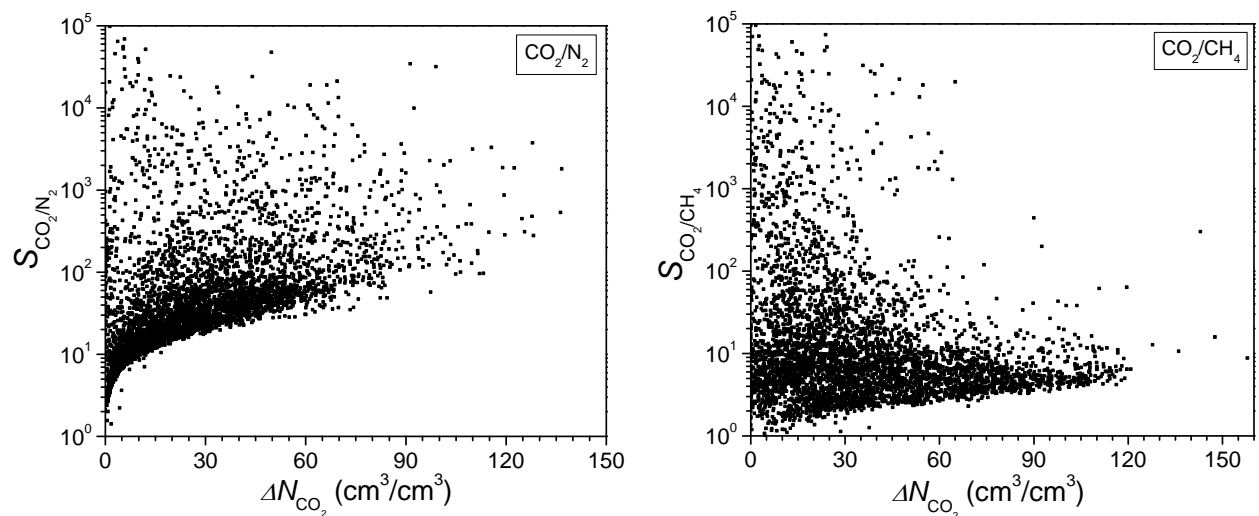

**Figure S6.** Relationships between selectivity  $S$  and working capacity  $\Delta N_{\text{CO}_2}$ .

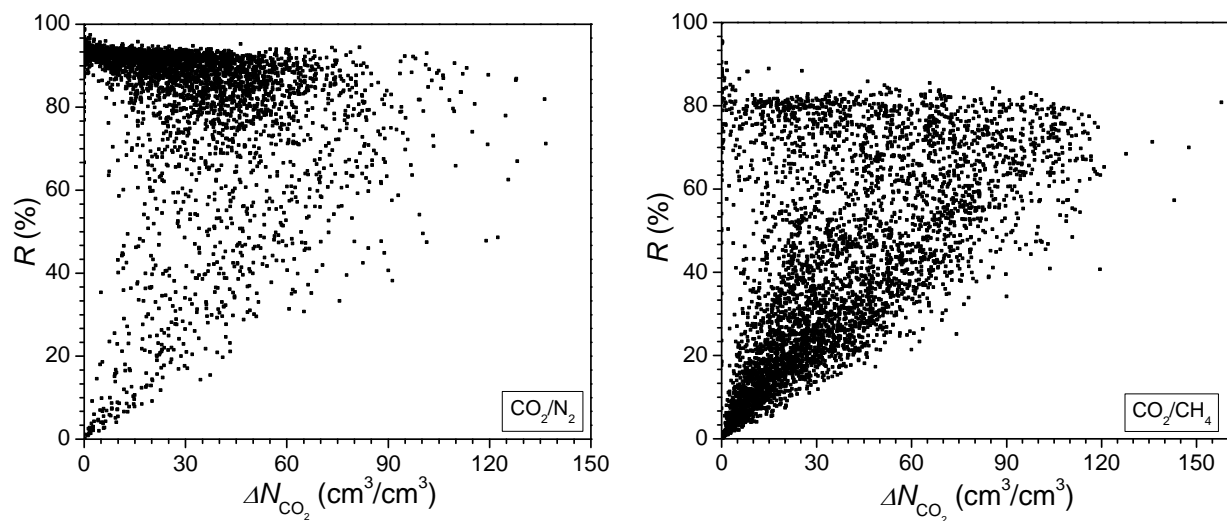

**Figure S7.** Relationships between regenerability  $R$  and working capacity  $\Delta N_{\text{CO}_2}$ .

**Table S3.** Fixed-bed parameters.

| Notation        | Meaning                          | Value |
|-----------------|----------------------------------|-------|
| $L_b$           | bed length (m)                   | 0.2   |
| $\varepsilon_b$ | bed voidage                      | 0.4   |
| $\nu$           | interstitial feed velocity (m/s) | 0.07  |
| $R_p$           | particle radius (cm)             | 0.15  |
| $\tau_p$        | tortuosity                       | 3     |
